# Supplementary material for: Pregnant Women’s Intentions and Subsequent Behaviors Regarding Maternal and Neonatal Service Utilization: Results from a Cohort Study in Nyanza Province, Kenya
Source: PubMed Central journal article supplement (PMC5021282; doi:10.1371/journal.pone.0162017), 2016-09-13
Supplement: pone.0162017.s003.pdf [file pone.0162017.s003.pdf]

Data dictionary – PLOS ONE – MNHCU study

| Variable name               | Variable label                           | Variable category value & label                                              |
|-----------------------------|------------------------------------------|------------------------------------------------------------------------------|
| intend_anc_baseline         | Baseline antenatal care intention        | Yes 1<br>No 0                                                                |
| intend_delfacility_baseline | Baseline facility delivery intention     | Yes 1<br>No 0                                                                |
| intend_pnc_baseline         | Baseline postnatal care intention        | Yes 1<br>No 0                                                                |
| intend_neo_baseline         | Baseline neonatal care intention         | Yes 1<br>No 0                                                                |
| intend_anc_fu               | Follow up antenatal care intention       | Yes 1<br>No 0                                                                |
| intend_delfacility_fu       | Follow up facility delivery intention    | Yes 1<br>No 0                                                                |
| intend_pnc_fu               | Follow up postnatal care intention       | Yes 1<br>No 0                                                                |
| intend_neo_fu               | Follow up neonatal care intention        | Yes 1<br>No 0                                                                |
| anc_e                       | Endline antenatal care use               | Yes 1<br>No 0                                                                |
| delfacility_e               | Endline facility delivery                | Yes 1<br>No 0                                                                |
| pnc_e                       | Endline postnatal care use               | Yes 1<br>No 0                                                                |
| neo_e                       | Endline neonatal care use                | Yes 1<br>No 0                                                                |
| agegr                       | Age-group (years)                        | <20 1<br>20-24 2<br>25-29 3<br>30-34 4<br>35+ 5                              |
| primimultigravida           | Parity                                   | Primipara 0<br>Multipara 1                                                   |
| mstatuspoly                 | Marital status                           | Married/in union, monogamous 0<br>Married/in union, polygamous 1<br>Single 2 |
| educgr                      | Education (years)                        | <5 1<br>5-8 2<br>>9 3                                                        |
| religion                    | Religion                                 | Protestant 1<br>Catholic 2<br>Other 3                                        |
| ga                          | Baseline gestational age (weeks)         | --continuous                                                                 |
| ga_fu                       | Follow-up gestational age (weeks)        | --continuous                                                                 |
| ga_e                        | End of pregnancy gestational age (weeks) | --continuous                                                                 |
| healthstatus                | Self-rated health status                 | Very poor/Poor<br>Neither poor nor good<br>Good/Very good                    |
| chronic                     | Has (known) chronic medical condition(s) | Yes 1<br>No 0                                                                |

|                       |                                                                                |                                                            |
|-----------------------|--------------------------------------------------------------------------------|------------------------------------------------------------|
| healthdecisions       | Main health decision-maker                                                     | Herself 1<br>Husband 2<br>Both 3<br>Other 4                |
| preg_complic_baseline | Self-reported pregnancy complications at baseline                              | Yes 1<br>No 0                                              |
| preg_complic_fu       | Self-reported pregnancy complications at follow-up                             | Yes 1<br>No 0                                              |
| preg_complic_bfu      | Self-reported pregnancy complications developed between baseline & follow-up   | Yes 1<br>No 0                                              |
| preg_complic_be       | Self-reported pregnancy complications developed between baseline & endline     | Yes 1<br>No 0                                              |
| preg_complic_fe       | Self-reported pregnancy complications developed between follow-up & endline    | Yes 1<br>No 0                                              |
| preg_complic          | Any self-reported pregnancy complications                                      | Yes 1<br>No 0                                              |
| care_complic_followup | Sought care for pregnancy complications by follow-up                           | Yes 1<br>No 0                                              |
| care_complic_endline  | Sought care for pregnancy complications by endline                             | Yes 1<br>No 0                                              |
| delcomplic_e          | Delivery complications                                                         | Yes 1<br>No 0                                              |
| delmode               | Vaginal delivery                                                               | Yes 1<br>No 0                                              |
| pregoutcome_e         | Pregnancy outcome                                                              | Live birth 4<br>Stillbirth 3                               |
| birthexp              | Self-reported birth experience                                                 | Good/very good 2<br>Poor/very poor/neither good nor poor 1 |
| kfs_anc_baseline      | Knowledge of free antenatal services at baseline                               | Yes 1<br>No 0                                              |
| kfs_anc_fu            | Knowledge of free antenatal services at follow-up                              | Yes 1<br>No 0                                              |
| kfs_del_fu            | Knowledge of free delivery services at follow-up                               | Yes 1<br>No 0                                              |
| kfs_del_e             | Knowledge of free delivery services at endline                                 | Yes 1<br>No 0                                              |
| ag                    | Study site                                                                     | Asembo 0<br>Gem 1                                          |
| s_delfacility         | Non-concordance facility delivery and facility delivery intention at baseline  | Yes 1<br>No 0                                              |
| s_delfacility_fu      | Non-concordance facility delivery and facility delivery intention at follow-up | Yes 1<br>No 0                                              |
| s_pnc                 | Non-concordance postnatal care and postnatal intention at baseline             | Yes 1<br>No 0                                              |
| s_pnc_fu              | Non-concordance postnatal care and postnatal intention at follow-up            | Yes 1<br>No 0                                              |
| s_neo                 | Non-concordance neonatal care and postnatal intention at baseline              | Yes 1<br>No 0                                              |

|                                                                                                                                                                                                                       |                                                                                                                                                                                                                                                                                                                   |                           |
|-----------------------------------------------------------------------------------------------------------------------------------------------------------------------------------------------------------------------|-------------------------------------------------------------------------------------------------------------------------------------------------------------------------------------------------------------------------------------------------------------------------------------------------------------------|---------------------------|
| s_neo_fu                                                                                                                                                                                                              | Non-concordance neonatal care and postnatal intention at follow-up                                                                                                                                                                                                                                                | Yes 1<br>No 0             |
| repeatbeh_e                                                                                                                                                                                                           | Intention to deliver in same place again                                                                                                                                                                                                                                                                          | Yes 1<br>Unsure 2<br>No 3 |
| prefsdp                                                                                                                                                                                                               | Preferred place of delivery                                                                                                                                                                                                                                                                                       | Yes 1<br>No 0             |
| reason_closestdp<br>reason_bestqualitysdp<br>reason_mostaffordablesdp<br>reason_ancsdp<br>reason_respectsdp<br>reason_cannotaffordothersdp<br>reason_didnotknowhereelse<br>reason_knowproviderssdp<br>reason_noanswer | <i>Reason choosing place of delivery</i><br>Closest to home<br>Facility offering best service quality<br>Most affordable place<br>This is where I went for antenatal care<br>I am treated with respect<br>Cannot afford going elsewhere<br>Did not know where else to go<br>I know the providers/TBA<br>No answer | Yes 1<br>No 0             |
